# 1 **Novel and known signals of selection for fat deposition in** 2 **domestic sheep breeds from Africa and Eurasia**

3

4 Salvatore Mastrangelo<sup>1</sup>, Hussain Bahbahani<sup>2\*</sup>, Bianca Moioli<sup>3\*</sup>, Abulgasim Ahbara<sup>4,5</sup>, Mohammed  
5 Al Abri<sup>6</sup>, Faisal Almathen<sup>7</sup>, Anne da Silva<sup>8</sup>, Baldassare Portolano<sup>1</sup>, Joram M. Mwacharo<sup>9</sup>, Olivier  
6 Hanotte<sup>4</sup>, Fabio Pilla<sup>10</sup>, Elena Ciani<sup>11</sup>

7

8 <sup>1</sup>Dipartimento di Scienze Agrarie, Alimentari e Forestali, University of Palermo, Viale delle  
9 Scienze, 90128 Palermo, Italy

10 <sup>2</sup>Department of Biological Sciences, Faculty of Science, Kuwait University, Safat 13060, Kuwait

11 <sup>3</sup>Consiglio per la ricerca in agricoltura e l'analisi dell'economia agraria (CREA), via Salaria 31,  
12 00015 Monterotondo, Italy

13 <sup>4</sup>School of Life Sciences, University of Nottingham, University Park, Nottingham, NG7 2RD UK

14 <sup>5</sup>Department of Zoology, Faculty of Sciences, Misurata University, Misurata, Libya

15 <sup>6</sup>Department of Animal and Veterinary Sciences, Sultan Qaboos University, Oman

16 <sup>7</sup>Department of Public Health and Animal Welfare, College of Veterinary Medicine, King Faisal  
17 University, Alhufuf, Al-Ahsa 31982, Saudi Arabia

18 <sup>8</sup>INRA, UMR1061 Génétique Moléculaire Animale, Limoges, France

19 <sup>9</sup>Small Ruminant Genomics, International Center for Agricultural Research in the Dry Areas  
20 (ICARDA), Addis Ababa, Ethiopia

21 <sup>10</sup>Dipartimento Agricoltura, Ambiente e Alimenti, Università degli Studi del Molise, Campobasso,  
22 Italy

23 <sup>11</sup>Dipartimento di Bioscienze, Biotecnologie e Biofarmaceutica, Università degli Studi di Bari Aldo  
24 Moro, Bari, Italy

25

26 **Corresponding author**

27 [elena.ciani@uniba.it](mailto:elena.ciani@uniba.it)

28

29 \*These authors contributed equally to this work

30

31 **Short title:** Selection signatures for fat deposition in sheep

32

33 **Abstract**

34 Genomic regions subjected to selection frequently show signatures such as within-  
35 population reduced nucleotide diversity and outlier values of differentiation among differentially  
36 selected populations. In this study, we analyzed 50K SNP genotype data of 373 animals belonging  
37 to 23 sheep breeds of different geographic origins using the *Rsb* and  $F_{ST}$  statistical approaches, to  
38 identify loci associated with the fat-tail phenotype. We also checked if these putative selection  
39 signatures overlapped with regions of high-homozygosity (ROH). The analyses identified novel  
40 signals and confirmed the presence of selection signature in genomic regions that harbor candidate  
41 genes known to affect fat deposition. Several genomic regions that frequently appeared in ROH  
42 were also identified within each breed, but only two ROH islands overlapped with the putative  
43 selection signatures. The results reported herein provide the most complete genome-wide study of  
44 selection signatures for fat-tail in African and Eurasian sheep breeds; they also contribute insights  
45 into the genetic basis for the fat tail phenotype in sheep, and confirm the great complexity of the  
46 mechanisms that underlie quantitative traits, such as the fat-tail.

47

48 **Introduction**

49 Natural selection plays an important role in determining the individuals that are best adapted  
50 to novel and existing environmental conditions. Besides natural selection, artificial selection has

51 been widely applied to livestock species to achieve more desirable/profitable phenotypes [1]. For  
52 instance, sheep (*Ovis aries*) have been selected since domestication, approximately 9,000 years ago  
53 [2]. This process of selection resulted in divergent sheep breeds, reared in different geographic  
54 regions due to their different adaptability. Among these, fat-tail are an important class of sheep  
55 breeds and represent about 25% of the world's sheep population [3] mainly distributed in the  
56 Middle East, North and East Africa and Central Asia. According to Xu et al. [4] fat tails represent  
57 the energy reserve necessary to survive critical conditions such as drought seasons and food  
58 shortage. This statement being emphasized by Mwacharo et al. [5] who confirmed that the fat-tails  
59 are the predominant sheep across the deserts of northern Africa, and in the highlands, semi-arid and  
60 arid environments of eastern and southern Africa while the thin-tails occur in Sudan and in the sub-  
61 humid and humid regions of West Africa.

62 The unique genetic patterns inscribed in the genome of individuals by natural and/or  
63 artificial selection are defined as signatures of selection, which are usually regions of the genome  
64 that harbor functionally important sequence variants [6]. Although human consumption of animal  
65 fat has dramatically reduced in preference of leaner meat, the investigation of the potential  
66 candidate genes involved in the fat-tail might contribute to exploring the genetics of fat deposition,  
67 energy storage and adaptation to climate changes [7-9]. With the aim to identify candidate genes  
68 with a potential role in these traits, several authors performed studies targeting the fat-tail  
69 phenotype contrasted with the thin-tail one. All authors used, for their comparisons, sheep of the  
70 same geographic regions to prevent referring to the fat-tail differentiation signals arising from  
71 different origins or isolation by distance. These studies included indigenous Chinese [4,8,10,11],  
72 Mediterranean-North African [9,12], Iranian [3] and Ethiopian breeds [13]. Similarly, in this study,  
73 the genomes of fat-tail sheep from different regions of Africa and Eurasia were contrasted with the  
74 genomes of thin-tail sheep of the same geographical area. In order to improve the specificity of  
75 signal detection, we combined two complimentary approaches ( $R_{sb}$  and  $F_{ST}$ ); moreover, as  
76 distinguishing false positive genes from candidate genes is not straightforward, selection signatures

77 of fat-tail were considered only when shared by two or more fat-tail breeds of different geographic  
78 origin, and substantiated by verifying whether the candidate genes in proximity of the anonymous  
79 markers of differentiation have a known, or assumed, role in fat deposition and adipogenesis in  
80 mammals.

81

## 82 **Materials and Methods**

### 83 **Samples, genotyping and quality control**

84 A total of 373 animals belonging to 23 sheep breeds from different geographic regions were  
85 selected (Table 1). For all the animals, genotype data from the Illumina OvineSNP50 BeadChip  
86 array were collated for the analysis. Chromosomal coordinates for each SNP were obtained from  
87 the latest release of the ovine genome sequence assembly Oar\_v4.0. The dataset was filtered to  
88 remove animals with more than 10% missing genotypes, SNPs with a call rate lower than 95% and  
89 with a minor allele frequency (MAF) lower than 1%, and to exclude non-autosomal and unassigned  
90 markers.

91

### 92 **Genetic relationships amongst breeds**

93 Pair-wise genetic relationships were estimated using identity-by-state genetic distances  
94 calculated with PLINK 1.7 [14] and graphically represented by multidimensional scaling (MDS)  
95 analysis.

96

### 97 **Signatures of selection analysis**

98 To analyze genome-wide selection signatures, the MDS results were used to categorize the  
99 23 breeds into contrasting genetic groups for comparative analysis. Table 1 summarizes the  
100 description of the breeds used in the pair-wise comparisons. The contrasting groups were as follow:

- 101 1. Ethiopian fat-tail breeds (11 breeds) vs. two thin-tail breeds from Sudan (Hammari and  
102 Kabashi);
- 103 2. Ethiopian long fat-tail breeds (6 breeds) vs. the two thin-tail breeds from Sudan;
- 104 3. Arabian peninsula fat-tail (Naimi, Najdi, Omani and Huri) vs. the two thin-tail breeds from  
105 Sudan;
- 106 4. Barbaresca vs. two Italian thin-tail breeds (Sardinian and Comisana);
- 107 5. Laticauda vs. the two Italian thin-tail breeds;
- 108 6. Libyan Barbary vs. Algerian Sidaoun.

109 Inter-population analyses of the six fat- vs. thin-tail groups (Table 1) were performed using  
110 the Extended Haplotype Homozygosity (EHH) – derived statistic  $Rsb$  [15], as in Bahbahani et al.  
111 [16-17]. To identify statistically significant SNPs under selection in each of the six pair-wise  
112 comparisons (positive  $Rsb$  value), one-sided  $P$ -values (fat- vs. thin-tail group) were derived as  
113  $-\log_{10}(1-\Phi(Rsb))$ , where  $\Phi(Rsb)$  represents the Gaussian cumulative distribution function. Inter-  
114 population genome-wide  $F_{ST}$  and  $\chi^2$  analysis were also performed to corroborate the results obtained  
115 with the  $Rsb$  analysis. The following constraints were introduced to define the fat-tail selection  
116 signatures: 1)  $-\log_{10}(P\text{-value}) \geq 3.2$ , equivalent to a  $P$ -value of 0.0005, was used as a threshold to  
117 define significant  $Rsb$ ; 2) candidate regions were retained if at least two SNPs, separated by  $\leq 200$   
118 Kb, passed this threshold; 3) the candidate region was present in two or more pair-wise  
119 comparisons.

120

## 121 **Runs of homozygosity**

122 Runs of homozygosity (ROHs) were estimated for each individual using PLINK 1.7 [14].  
123 The minimum length that constituted the ROH was set to one Mb. The following criteria were also  
124 used: (i) one missing SNP was allowed in the ROH, and up to one possible heterozygous genotype;  
125 (ii) the minimum number of SNPs that constituted the ROH was set to 30; (iii) the minimum SNP

126 density per ROH was set to one SNP every 100 kb; (iv) maximum gap between consecutive  
127 homozygous SNPs of 1000 Kb. The percentage of SNP residing within an ROH for a given breed  
128 was estimated by counting the number of times that each SNP appeared in a ROH and by dividing  
129 that number by the number of animals in each breed, allowing us to obtain a locus homozygosity  
130 range (from 0 to 1). To identify the genomic regions of “high homozygosity”, also called ROH  
131 islands, the top 0.9999 SNPs of the percentile distribution of the locus homozygosity range within  
132 each breed were selected.

133

## 134 **Gene annotation**

135 Candidate regions identified by different approaches were used to annotate genes, that were  
136 either entirely or partially included within each selected region, using the NCBI Genome Data  
137 Viewer (<https://www.ncbi.nlm.nih.gov/genome/gdv/browser/?context=gene&acc=101104604>).  
138 Finally the biological functions of each annotated gene within the selection signatures was  
139 investigated via a comprehensive search of literature.

140

## 141 **Results**

142 After quality control, 43,224 SNPs and 349 animals (6 to 39 per breed) were retained for the  
143 analyses (Table 1). To examine and visualize the genetic relationships among the 23 sheep breeds,  
144 we used a MDS plot of the pairwise identity-by-state distance. The results showed that most sheep  
145 breeds formed non-overlapping clusters and were clearly separate populations (Fig 1). The first  
146 dimension (C1) separated the Italian breeds from the Arabian Peninsula and African ones, likely  
147 reflecting different breeding histories. The second dimension (C2) distinguished Barbaresca from  
148 the other breeds. Therefore, with the exception of Barbaresca, the MDS grossly separated the breeds  
149 according to their genetic origin and/or to geographical proximity between their breeding areas. The  
150 Ethiopian breeds were separated into two groups: one including the three fat-rumped breeds and one

151 short fat-tail (Molale), and one group including the long fat-tail breeds and the other short fat-tail  
152 breed (Gafera). Noteworthy, the MDS plot did not separate the breeds on the basis of the different  
153 tail phenotypes.

154

155 **Fig 1. Genetic relationships among the 23 sheep breeds defined through multidimensional**  
156 **scaling analysis**

157

158 In this study, selection signatures for fat-tail were identified using the *Rsb* approach, after  
159 corroboration with  $F_{ST}$  approach. The markers with a significant inter-population *Rsb* are shown in  
160 S1-S6 Tables, corresponding to the six comparisons described in the Material and methods.  
161 Likewise, in S7-S12 Tables, genome-wide  $F_{ST}$  and  $\chi^2$  values, with the corresponding Bonferroni  
162 corrected  $\chi^2$  *P*-values, are shown. A summary of the number of significant SNPs obtained with the  
163 different statistical methods in the six pair-wise comparisons is reported in Table 2.

164 The genome-wide Manhattan plots where significant signals of differentiation between the fat-tail  
165 breed/group and the thin-tail of the corresponding region were shared by two or more fat-tail  
166 breed/group are reported in S1-S14 Figs. The y axis shows the probability of *Rsb* values for each  
167 marker across the genome ( $-\log_{10}(1-\Phi(Rsb))$ ). Below each plot, the positions of the significant  
168 SNPs, with their corresponding probability values, are reported for each fat-tail breed/group.  $F_{ST}$   
169 values and Bonferroni corrected  $\chi^2$  *P*-values are reported only when achieved by significant SNPs  
170 located in the candidate region, or at distance  $\leq 0.2$  Mb up- and down-stream of the candidate  
171 region boundaries.

172 The majority of shared fat-tail signals were observed for the two groups of Ethiopian breeds  
173 on chromosomes (OAR) 5, 6, 10, 18 and 19 (S3, S5, S9, S13 and S14 Figs, respectively) and by the  
174 two breeds of Barbary sheep origin (Laticauda and Libyan Barbary) on OAR 3, 10, 12, 13 (S2, S9,  
175 S10 and S11 Figs, respectively). It is interesting to note that all the regions shown in S1-S14 Figs  
176 registered the presence of at least one marker attaining highly significant *Rsb* values, i.e.  $> 4$ ,

177 equivalent to a  $P$ -value of 0.0001. Moreover, in all the regions, except the one on OAR12 that is  
178 shared between Laticauda and Libyan Barbary (S10 Fig), at least one significant  $\chi^2$  value was also  
179 registered in either one or both of the fat-tail breed/groups.

180 Several genomic regions that frequently appeared in a ROH were identified within each  
181 breed (S15 and S16 Figs, for fat- and thin-tail sheep breeds, respectively). Table 3 provides the  
182 chromosome position, and the start and end of the ROH islands. The top 0.9999 SNPs of the  
183 percentile distribution of locus homozygosity values led to the use of different thresholds for each  
184 breed (from 0.11 to 0.83), and a total of 15 genomic regions of high-homozygosity across breeds  
185 were identified. Although the distribution of the ROH was relatively balanced and the signals were  
186 moderate in height, we found a few outstanding peaks with a high occurrence of ROH, especially in  
187 the Barbaresca breed (S15 Fig).

188

## 189 **Discussion**

190 In studies aiming to detect genomic signals for specific traits, for instance signals directly  
191 associated with fat deposition and adipogenesis, the major drawback is to detect strong differences  
192 (viz. between fat-tail and thin-tail breeds) that are due either to different origins or to reproductive  
193 isolation, and not obviously involved in the trait (fat deposition). In this work, the fat-tail breeds  
194 from Ethiopia, Algeria, Arabian peninsula and southern Italy were pair-wise compared with their  
195 thin-tail counterparts from the closest geographical region. The signals that are detected between  
196 any two or more simultaneous pair-wise comparisons might consequently be considered more  
197 reliable, also because they are shown by geographically distant sheep breeds. While the fat-tail  
198 sheep of Algeria, Arabian peninsula and southern Italy were all long or semi-long fat-tail breeds,  
199 the Ethiopian fat-tail breeds included long-tail, short-tail and fat-rumped sheep breeds (Table 1).  
200 Therefore, for the Ethiopian sheep, two different pair-wise comparisons were performed, the first  
201 including all the 11 fat-tail breeds, the second including only the 6 long fat-tail breeds. The



202 assumption here was that the first comparison might elucidate the genes involved with  
203 adipogenesis, irrespective of the shape of the tail, while the second comparison would reveal  
204 findings that are more comparable to those observed in the breeds from the other regions, and are  
205 therefore possibly more likely to be linked to the fat-tail phenotype.

206 We used two different, but complementary, statistical approaches to identify putative  
207 selection signatures across the phenotypically different breeds. The  $F_{ST}$  index of differentiation is  
208 among the most widely used statistic to detect signals of selection in differentially-selected  
209 populations, where usually a locus is putatively considered under differential selection if its pair-  
210 wise  $F_{ST}$  has a rank percentile value of 0.01 or less. Because the level of genetic differentiation  
211 between each pair of breeds/groups of the six comparisons highly varied, the decision “*a priori*” of  
212 a rank percentile to accept significant  $F_{ST}$  may disfavor the pairs presenting the highest genetic  
213 diversity. Therefore, following Moioli et al. [12] who showed that  $F_{ST}$  and  $\chi^2$  are highly correlated,  
214 in order to confirm with a statistical test which markers were significant, we calculated inter-  
215 population locus-specific  $\chi^2$  values and considered significant the markers reaching a Bonferroni-  
216 adjusted  $\chi^2$   $P$ -values  $\leq 0.05$ . Doing so, the different numbers of significant markers in each pair-  
217 wise comparison allows to appreciate their global genetic difference. However, since  $F_{ST}$  and  $\chi^2$   
218 values are based on allele frequencies and might represent an isolated event occurring by chance,  
219 and not necessarily associated with fat-tail signals, in this case, the extended haplotype  
220 homozygosity derived statistic,  $Rsb$ , was preferentially used. This statistic in fact considers the  
221 whole haplotype region around one marker, or group of markers, and the larger is the region in  
222 which the homozygous haplotype was maintained in the first breed in contrast with the second  
223 breed, the more reliable is the probability of carrying a fat-tail signal. The number of significant  
224 SNPs for inter-population  $Rsb$  is smaller than the number of significant SNPs for  $\chi^2$  (Table 2)  
225 confirming that the first method is more stringent. In most cases, the number of SNPs that are  
226 significant with one method showed some correlation with the number of SNPs that were obtained  
227 with the second method: the higher was the number of the significant  $Rsb$  values, the higher was

228 also the number of significant  $F_{ST}$  values. The highest number of significant signals obtained with  
229 both methods was observed in the Barbaresca breed – 1.5 % for inter-population  $Rsb$  and 5.6 % for  
230  $F_{ST}/\chi^2$ , while the lowest number was in the Arabian peninsula breeds: 0.15 and 0.25% with the two  
231 methods, respectively. In accordance with our results, Yuan et al. [11], in a selection signature  
232 analysis for tail type in sheep, identified seven and twenty-six regions using the extended haplotype  
233 homozygosity and  $F_{ST}$  approaches, respectively, and only six small regions using both approaches.  
234 Bahbahani et al. [18] showed that the two common approaches (inter-population  $Rsb$  and  $F_{ST}$ ), used  
235 to identify signatures of positive selection in East African Shorthorn Zebu, did not produce  
236 overlapping signals. Although the authors interpreted the observed absence of overlaps between  $Rsb$   
237 and  $F_{ST}$  analyses as a possible consequence of the selection time-scale, with  $Rsb$  being considered  
238 more suitable for detecting signatures of recent selection, it may also be hypothesized that false  
239 positives may occur when using both  $Rsb$  and  $F_{ST}$ . As the aim of this study was to identify loci most  
240 likely associated with fat-tail, we established that the candidate region(s) should be present in two  
241 or more pair-wise comparisons (Table 4). Therefore only the signatures satisfying these criteria and  
242 encompassing annotated genes will be subsequently discussed.

243 Another method for detecting signatures of positive selection based on intra-population  
244 analysis is the identification of high-homozygosity regions [6]. Since ROHs are normally abundant  
245 in regions under positive selection, their accumulation at specific loci, or islands, has been used to  
246 identify genomic regions that reflect directional selection in cattle [19], sheep [20], horse [21] and  
247 goat [22]. We therefore checked if such regions of high-homozygosity overlapped with putative  
248 selection signatures in the sheep breeds considered in this study.

249 The region in OAR3:104.2-105.9 Mb (S1 Fig and Table 4) was identified in two  
250 comparisons: fat-tail sheep of the Arabian peninsula vs. Sudanese thin-tail sheep, and Libyan  
251 Barbary vs. Algerian Sidaoun. Out of the ten genes found in this region, only *ANAPCI* has been  
252 associated with obesity-related traits by Comuzzie et al. [23] in a Genome-Wide Association Study  
253 (GWAS) on Hispanic children. The signature on OAR3:154.0-155.6 Mb (S2 Fig and Table 4),

254 detected in the Laticauda and the Libyan Barbary breeds, had already been reported for the  
255 Barbaresca, Laticauda and Chios breeds [9]. Yuan et al. [11], in a GWAS on seven indigenous  
256 Chinese sheep, by contrasting fat-tail versus thin-tail phenotypes, detected a signature in this region  
257 encompassing the *MSRB3*, that has been identified as a candidate gene associated with adaptation  
258 [24]. In a study on world sheep breeds, *MSRB3* was highlighted to have experienced high selection  
259 pressure [25]. However, Yuan et al. [11] warned on the possibility of distinguishing, through  
260 GWAS, false positive genes from candidate genes. On the other hand, Wei et al. [10] analyzed  
261 Chinese native sheep by contrasting thin-tail (Tibetan group) and fat-tail (Mongolian and Kazakh  
262 group) types and suggested that the genes encoded by the signal on OAR3, *i.e.* *MSRB3* and *LEMD3*,  
263 would be best considered as candidates for ear size. This hypothesis is supported by the fact that  
264 *MSRB3* and *LEMD3* were identified as candidate genes for ear morphology in dogs [26] and pigs  
265 [27]. Therefore, despite these genes having not been associated with the ear size [28], doubts on  
266 ascribing this signal to the fat-tail are obvious. A large region on OAR5:47.0-49.0 Mb (S3 Fig and  
267 Table 4) turned out here to encode putative fat deposition genes in the two groups of Ethiopian  
268 sheep: the one composed only by the long fat-tail, and the one including all the eleven Ethiopian  
269 fat-tail breeds. Although Fariello et al. [29] reported that this region encoded a signature  
270 differentiating prolific and non-prolific Asian sheep, the involvement of a signature in this region in  
271 the fat-tail phenotype had been previously reported [9,12]. This involvement is corroborated by  
272 genetic studies of body mass index in humans, describing a role played in obesity by the *CXXC5*  
273 gene in Americans [30] and the *PSD2* gene in the Japanese population [31]. Moreover, this  
274 selection signature overlapped with the ROH island identified in the Ethiopian fat-tail breeds, which  
275 include 17 and 29 homozygous markers respectively for the two groups of breeds (the eleven  
276 Ethiopian fat-tail, and the six Ethiopian long fat-tail). The signal on OAR6:38.1-39.6 Mb (S4 Fig  
277 and Table 4) was detected in Barbaresca and Laticauda and was previously reported as selection  
278 signature for fat-tail in these two breeds, also when compared with 13 Italian thin-tail breeds [9]. It  
279 includes the *SLIT2* gene, a potential candidate for internal organ weights in Simmental beef cattle

280 [32] and therefore possibly connected with fat deposition. This signal is worth investigating further,  
281 because it encompasses a large region (1.5 Mb) where the Barbaresca showed 27 SNP markers with  
282 allele frequency patterns that are highly differentiated from the Italian thin-tail breeds, 15 of which  
283 exceeded the significant threshold of *Rsb*  $P$ -value  $< 0.0001$ . Moreover, this genomic region partially  
284 overlapped with the ROH island on OAR6 detected in Barbaresca and shared by more than 80% of  
285 the individuals of this breed. The Laticauda showed less significant signals in the same region, with  
286 the exception of a highly significant one ( $-\log_{10}(P\text{-value}) = 7.68$ ) at position 38,345,613 bp.  
287 Moreover, several markers attained high  $F_{ST}$  values and significant  $\chi^2$  values in the pair-wise  
288 comparisons of both breeds. However, because the two breeds have Barbary origin, it is also  
289 possible that this signature encodes loci inherited from North-African breeds. The selection  
290 signature on OAR6:55.6-55.7 Mb (S5 Fig and Table 4) was shown in this study to be present in the  
291 two groups of Ethiopian breeds; it has never been reported before as a fat-tail signal and the only  
292 gene included in the region (*DTHDI*) does not appear to have any connection with fat deposition.  
293 On the same chromosome, at position 76.5-77.5 Mb (S6 Fig and Table 4), we identified another  
294 signal in the Ethiopian group (eleven breeds) and the Laticauda, which has been reported previously  
295 in the Barbaresca but not in the Laticauda [9]. Although the thin-tail breeds analyzed in the  
296 aforementioned study for the pair-wise comparison with the Barbaresca and the Laticauda were not  
297 the same as those used here, and the methodology used to detect the signatures was also different, it  
298 is likely that this is merely a suggestive fat-tail signal. Moreover, for the only annotated gene in this  
299 region (*ADGRL3*), to the best of our knowledge, no association with adipogenesis has been  
300 reported. Another candidate region identified on OAR6:80.6-81.0 Mb (S7 Fig and Table 4), shown  
301 by the Ethiopian group (eleven breeds) and the Libyan Barbary and including the *EPHA5* gene, was  
302 also detected in a GWAS for wool production traits in a Chinese Merino sheep population and  
303 reported to be significantly associated with fiber diameter [33]. Moreover, it has been identified  
304 through GWAS as a candidate gene for feed conversion ratio in Nellore cattle [34]. The signal on  
305 OAR7:33.5-33.9 Mb (S8 Fig and Table 4) was detected in the Barbaresca and Laticauda, as well as

306 in a previous study [9]. While these authors could not assign an obvious role of any of the genes  
307 located in this region, Lirangi et al. [35] suggested that the *CHPI* gene is involved in cellular fat  
308 storage. Inoue et al. (2014) revealed that *OIP5* promotes proliferation of pre- and mature-adipocytes  
309 and contributes adipose hyperplasia; moreover, an increase of *OIP5* may associate with  
310 development of obesity. A common candidate region located on OAR10:40.2-45.0 Mb (S9 Fig and  
311 Table 4) observed in the two groups of Ethiopian sheep, Libyan Barbary and Laticauda, includes  
312 the *PCDH9* gene. The same signature was detected by Kim et al. [37] who contrasted the Egyptian  
313 Barki sheep with British breeds, and referred to it as signal of adaptation to arid environments.  
314 However, the Barki is a fat-tail sheep while the British are all thin-tail breeds. We would then  
315 propose the idea that this is a signal of fat-deposition, this being corroborated by the presence of  
316 *PCDH9*, reported by Wang et al. [38] as a candidate gene for obesity in humans. The signal on  
317 OAR12:43.0-43.3 Mb, shared by the Laticauda and the Libyan Barbary (S10 Fig and Table 4) has  
318 not been reported previously as a fat-tail signal and the two genes (*RERE* and *SLC45A1*) included in  
319 the region do not appear to have any connection with fat deposition. *RERE* has been identified as  
320 candidate for embryonic growth and reproductive development, whereas *SLC45A1* plays an  
321 important role in immunity related to tropical adaptation [39]. On OAR13:45.5-48.4 Mb, a selection  
322 signature shared by the Laticauda and the Libyan Barbary was identified (S11 Fig and Table 4). The  
323 region was also reported as a fat-tail signature in several studies [9-11]. The strong linkage  
324 disequilibrium between the SNPs in this OAR13 region with a missense mutation in exon 1 of the  
325 *BMP2* gene (OAR13:48,552,093-48,897,111 bp) was demonstrated by Moioli et al. [12] in the  
326 Laticauda fat-tail and Altamurana thin-tail sheep. Yuan et al. [11] emphasized that *BMP2* may play  
327 important roles in fat tail formation. However, here *BMP2* does not appear to be the only candidate  
328 gene. This signature spans a size > 3Mb, and Laticauda showed a very high *Rsb* value (-log<sub>10</sub>-  
329 Pvalue=7.96) at position 46,582,744 bp. A transcriptome profile analysis of adipose tissues from  
330 fat- and short-tailed Chinese sheep identified *CDS2* among the differentially expressed genes [40].  
331 This gene which spans 46,560,029 to 46,605,239 bp of OAR13, encompasses the significant marker

332 mentioned above. Another candidate region on OAR17:61.0-61.6 Mb, shared by the Ethiopian  
333 group (eleven breeds) and the Libyan Barbary (S12 Fig and Table 4) has not been detected  
334 previously as a fat-tail signal in sheep. However, Fox et al. [41] associated the *OAS2* gene found in  
335 this region to body fat distribution. Finally, the candidate regions on OAR18:1.8-2.2 Mb, and  
336 OAR19:51.6-51.8 Mb, shared by the two groups of Ethiopian breeds (S13 and S14 Figs,  
337 respectively) have not been reported previously as fat-tail signals and the five genes included in the  
338 two regions (*ATP10A* on OAR18, and *CDC25A*, *MAP4*, *DHX30*, *SMARCC1* on OAR19) do not  
339 appear to have any obvious connection with fat deposition. However, other studies also reported  
340 genes mapped in the same two regions with no obvious roles in sheep tail type or fat deposition  
341 [3,11]. The complexity of the fat-tail phenotype [10] may partly justify the high number of signals  
342 detected in the pair-wise comparisons.

343 As reported above, only two ROH islands identified in fat-tail breeds overlapped with the  
344 selection signatures. One reason for the little overlap is that ROH might detect selection related to  
345 any trait, while contrasting thin and fat tail breeds is more likely to detect signal related to this trait.  
346 However, Purfield et al. [20] reported a significant moderate correlation between the occurrence of  
347 SNPs in a ROH and two different statistical approaches ( $F_{ST}$  and HapFLK) for identifying putative  
348 selection signatures, and showed two ROH islands that overlapped with selection signatures.  
349 Moreover, the ROH island on OAR5 identified in the Ethiopian breeds was also identified in the  
350 Lori Bakhtiari fat-tail breed [10]. The authors reported that this increase in homozygosity would be  
351 consistent with selection for mutations affecting fat-tail size several thousand years following  
352 domestication. Therefore, although the existence of ROH islands has been attributed to several  
353 factors (recombination events, demography) [42], our results corroborate the hypothesis that regions  
354 of high-homozygosity may indeed harbor targets of positive selection, as also observed in previous  
355 studies [20,22,43].

356 In this study, we report so far the most complete genome-wide study of selection signatures  
357 for fat-tail in sheep. We identified novel signals and confirmed the presence of selection signatures

358 in the genomic regions that harbor candidate genes that are known to affect fat deposition. These  
359 findings also confirm the great complexity of the mechanisms underlying quantitative traits, such as  
360 the fat-tail, and further confirm the hypothesis that many different genes are involved in the  
361 phenotype. However, it is important to highlight that among the candidate genomic regions, false  
362 positives may still be a possibility. Therefore, further studies using different populations and the  
363 new ovine high-density SNP chip will be required to confirm and refine our results and investigate  
364 the role of specific genes. Notwithstanding, the selection signatures reported here provide  
365 comprehensive insights into the genetic basis underlining the fat tail phenotype in sheep.

366

## 367 **Conflict of interest**

368 The authors declare that they have no competing interests.

369

## 370 **Data Availability Statement**

371 This article reports no new genotyping data. All relevant data are within the paper and its  
372 Supporting Information files.

373

## 374 **References**

- 375 1. Brito LF, Kijas JW, Ventura RV, Sargolzaei M, Porto-Neto LR, Cánovas A, et al. Genetic  
376 diversity and signatures of selection in various goat breeds revealed by genome-wide SNP  
377 markers. *BMC Genomics*. 2017;18: 229.
- 378 2. Handley LL, Byrne K, Santucci F, Townsend S, Taylor M, Bruford MW. Genetic structure of  
379 European sheep breeds. *Heredity*. 2007;99:620.
- 380 3. Moradi MH, Nejati Navaremi A, Moradi-Shahrabak M, Dodds K, McEwan JC. Genomic scan  
381 of selective sweeps in thin and fat tail sheep breeds for identifying of candidate regions  
382 association with fat deposition. *BMC Genet*. 2012;13:10.

- 383 4. Xu SS, Ren X, Yang GL, Xie XL, Zhao YX, Zhang M, et al. Genome-wide association analysis  
384 identifies the genetic basis of fat deposition in the tails of sheep (*Ovis aries*) *Anim Genet.*  
385 2017;48:560-569.
- 386 5. Mwacharo JM, Kim ES, Elbeltagy AR, Aboul-Naga AM, Rischkowsky BA, Rothschild MF.  
387 Genomic footprints of dryland stress adaptation in Egyptian fat-tail sheep and their divergence  
388 from East African and western Asia cohorts. *Sci Rep.* 2017;7:7647.
- 389 6. Qanbari S, Simianer H. Mapping signatures of positive selection in the genome of livestock. *Liv*  
390 *Sci.* 2014;166:133-143.
- 391 7. Lv FH, Agha S, Kantanen J, Colli L, Stucki S, Kijas JW. et al. Adaptations to Climate-Mediated  
392 Selective Pressures in Sheep. *Mol Biol Evol.* 2014;31:3324–3343.
- 393 8. Yang J, Li WR, Lv FH, He SG, Tian SL, Peng WF, et al. Whole-genome sequencing of native  
394 sheep provides insights into rapid adaptations to extreme environments. *Mol Biol Evol.*  
395 2016;33:2576-2592.
- 396 9. Mastrangelo S, Moioli B, Ahbara A, Latairish S, Portolano B, Pilla F, et al. Genome-wide scan of  
397 fat-tail sheep identifies signals of selection for fat deposition and adaptation. *Anim Prod Sci.*  
398 2018a;doi.org/10.1071/AN17753.
- 399 10. Wei C, Wang H, Liu G, Wu M, Cao J, Liu Z, et al. Genome-wide analysis reveals population  
400 structure and selection in Chinese indigenous sheep breeds. *BMC Genomics.* 2015;16:194.
- 401 11. Yuan Z, Liu E, Kijas JW, Zhu C, Hu S, Ma X, et al. Selection signature analysis reveals genes  
402 associated with tail type in Chinese indigenous sheep. *Anim Genet.* 2017;48:55-66.
- 403 12. Moioli B, Pilla F, Ciani E. Signatures of selection identify loci associated with fat tail in sheep.  
404 *J Anim Sci.* 2015;93:4660–4669.
- 405 13. Ahbara A, Bahbahani H, Almathen F, Al Abri M, Agoub MO, Abeba A, et al. Genome-wide  
406 variation and putative candidate regions and genes associated with fat deposition and tail  
407 morphology in Ethiopian indigenous sheep. *Front Genet.* (submitted).
- 408 14. Purcell S, Neale B, Todd-Brown K, Thomas L, Ferreira MA, Bender D, et al. PLINK: a tool set  
409 for whole-genome association and population-based linkage analyses. *Am J Hum Genet.*  
410 2007;81:559–575.
- 411 15. Tang K, Thornton KR, Stoneking M. A new approach for using genome scans to detect recent  
412 positive selection in the human genome. *PLoS Biol.* 2007;5(7): e171.
- 413 16. Bahbahani H, Tijjani A, Mukasa C, Wragg D, Almathen F, Nash O, et al. Signature of selection  
414 for environmental adaptation and zebu x taurine hybrid fitness in East African Shorthorn Zebu.  
415 *Front Genet.* 2017; 8: 1.



- 416 17. Bahbahani H, Salim B, Almathen F, Al Enezi F, Mwacharo JM, Hanotte O. Signatures of  
417 positive selection in African Butana and Kenana dairy zebu cattle. *PloS one*. 2018;13(1):  
418 e0190446.
- 419 18. Bahbahani H, Clifford H, Wragg D, Mbole-Kariuki MN, Van Tassell C, Sonstegard T, et al.  
420 Signatures of positive selection in East African Shorthorn Zebu: A genome-wide single  
421 nucleotide polymorphism analysis. *Sci Rep*. 2015;5:11729.
- 422 19. Mastrangelo S, Sardina MT, Tolone M, Di Gerlando R, Suter AM, Fontanesi L, et al. Genome-  
423 wide identification of runs of homozygosity islands and associated genes in local dairy cattle  
424 breeds. *Animal*. 2018c; doi:10.1017/S1751731118000629
- 425 20. Purfield DC, McParland S, Wall E, Berry D.P The distribution of runs of homozygosity and  
426 selection signatures in six commercial meat sheep breeds. *PLoS ONE*. 2017;12:e0176780.
- 427 21. Metzger J, Karwath M, Tonda R, Beltran S, Águeda L, Gut M, et al. Runs of homozygosity  
428 reveal signatures of positive selection for reproduction traits in breed and non-breed horses.  
429 *BMC Genomics*. 2015;16:764.
- 430 22. Talenti A, Bertolini F, Pagnacco G, Pilla F, Ajmone-Marsan P, Rothschild MF et al. The  
431 Valdostana goat: a genome-wide investigation of the distinctiveness of its selective sweep  
432 regions. *Mamm Genome*. 2017; 28: 114-128.
- 433 23. Comuzzie AG, Cole SA, Laston SL, Voruganti VS, Haack K, Gibbs RA, et al. Novel genetic  
434 loci identified for the pathophysiology of childhood obesity in the Hispanic population. *PLoS*  
435 *One*. 2012;7: e51954.
- 436 24. Wei C, Wang H, Liu G, Zhao F, Kijas JW, Ma Y, et al. Genome-wide analysis reveals  
437 adaptation to high altitudes in Tibetan sheep. *Sci Rep*. 2016; 6:26770.
- 438 25. Kijas JW, Lenstra JA, Hayes B, Boitard S, Porto Neto LR, San Cristobal M, et al. Genome-wide  
439 analysis of the world's sheep breeds reveals high levels of historic mixture and strong recent  
440 selection. *PLoS Biol*. 2012;10:e1001258.
- 441 26. Vaysse A, Ratnakumar A, Derrien T, Axelsson E, Pielberg GR, Sigurdsson S, et al.  
442 Identification of genomic regions associated with phenotypic variation between dog breeds using  
443 selection mapping. *PLoS Genet*. 2011;7: e1002316.
- 444 27. Wilkinson S, Lu ZH, Megens H-J, Archibald AL, Haley C, Jackson IJ, et al. Signatures of  
445 Diversifying Selection in European Pig Breeds. *PLoS Genet*. 2013;9: e1003453.
- 446 28. Gao L, Xu SS, Yang JQ, Shen M, Li MH. Genome-wide association study reveals novel genes  
447 for the ear size in sheep (*Ovis aries*). *Anim Genet*. 2018; doi.org/10.1111/age.12670.
- 448 29. Fariello MI, Servin B, Tosser-Klopp G, Rupp R, Moreno C, San Cristobal M, et al. Selection  
449 signatures in worldwide sheep populations. *PLoS ONE*. 2014;9:e103813.

- 450 30. Locke AE, Kahali B, Berndt SI, Justice AE, Pers TH, Day FR, et al. Genetic studies of body  
451 mass index yield new insights for obesity biology. *Nature*. 2016;518:197-206.
- 452 31. Akiyama M, Okada Y, Kanai M, Takahashi A, Momozawa Y, Ikeda M, et al. Genome-wide  
453 association study identifies 112 new loci for body mass index in the Japanese population. *Nature*  
454 *Genet*. 2017; 49:1458.
- 455 32. An B, Xia J, Chang T, Wang X, Miao J, Xu L, et al. Genome-wide association study identifies  
456 loci and candidate genes for internal organ weights in Simmental beef cattle. *Physiol Genomics*.  
457 2018; doi: 10.1152/physiolgenomics.00022.2018.
- 458 33. Wang Z, Zhang H, Yang H, Wang S, Rong E, Pei W, et al. Genome-Wide Association Study for  
459 Wool Production Traits in a Chinese Merino Sheep Population. *PLoS ONE*. 2014a; 9: e107101.
- 460 34. de Almeida Santana MH, Oliveira Junior GA, Cesar AS, Freua MC, da Costa Gomes R, da Luz  
461 ES, et al. Copy number variations and genome-wide associations reveal putative genes and  
462 metabolic pathways involved with the feed conversion ratio in beef cattle. *J Appl Genet*.  
463 2016;7:495-504.
- 464 35. Lirangi M, Meydani M, Zingg JM, Azzi A. a-Tocopheryl-phosphate regulation of gene  
465 expression in preadipocytes and adipocytes. *Biofactors*. 2012;38:450-7.
- 466 36. Inoue K, Maeda N, Mori T, Sekimoto R, Tsushima Y, Matsuda K, et al. Possible Involvement  
467 of Opa-Interacting Protein 5 in Adipose Proliferation and Obesity. *PLoS ONE*. 2014;9:e87661.
- 468 37. Kim ES, Elbeltagy AR, Aboul-Naga AM, Rischkowsky B, Sayre B, Mwacharo JM, et al.  
469 Multiple genomic signatures of selection in goats and sheep indigenous to a hot arid  
470 environment. *Heredity*. 2016;116:255-64.
- 471 38. Wang K, Li WD, Zhang CK, Wang Z, Glessner JT, Grant SF, et al. A genome-wide association  
472 study on obesity and obesity-related traits. *PLoS One*. 2011; 28;6(4):e18939.
- 473 39. Randhawa IA, Khatkar MS, Thomson PC, Raadsma HW. A meta-assembly of selection  
474 signatures in cattle. *PLoS One*. 2016;11:e0153013.
- 475 40. Wang X, Zhou G, Xu X, Geng R, Zhou J, Yang Y, et al. Transcriptome profile analysis of  
476 adipose tissues from fat and short-tailed sheep. *Gene*. 2014b;549:252-7.
- 477 41. Fox CS, Liu Y, White CC, Feitosa M, Smith AV, Heard-Costa N, et al. Genome-wide  
478 association for abdominal subcutaneous and visceral adipose reveals a novel locus for visceral  
479 fat in women. *PLoS Genet*. 2012;8:e1002695.
- 480 42. Bosse M, Megens HJ, Madsen O, Paudel Y, Frantz LA, Schook LB, et al. Regions of  
481 homozygosity in the porcine genome: consequence of demography and the recombination  
482 landscape. *PLoS Genet*. 2012;8:e1003100.

- 483 43. Bertolini F, Figueiredo Cardoso T, Marras G, Nicolazzi EL, Rothschild MF, Amills M, et al.  
484 Genome-wide patterns of homozygosity provide clues about the population history and  
485 adaptation of goats. *Genet Select Evol.* 2018;50:59.

487 **Table 1. Breeds, number of animals (N), tail type, country and origin of genotyping data of**  
488 **the breeds used in the contrasting groups (fat- vs. thin-tail).**

| <b>Breed</b>     | <b>N</b> | <b>Tail type</b> | <b>Country</b>    | <b>Comparison</b> | <b>Data origin</b> |
|------------------|----------|------------------|-------------------|-------------------|--------------------|
| Bonga            | 9        | long fat-tail    | Ethiopia          | 1, 2              | [13]               |
| Doyogena         | 15       | long fat-tail    | Ethiopia          | 1, 2              | [13]               |
| Gesses           | 10       | long fat-tail    | Ethiopia          | 1, 2              | [13]               |
| Kido             | 10       | long fat-tail    | Ethiopia          | 1, 2              | [13]               |
| Loya             | 15       | long fat-tail    | Ethiopia          | 1, 2              | [13]               |
| Shubi Gemo       | 15       | long fat-tail    | Ethiopia          | 1, 2              | [13]               |
| Kefis            | 14       | rumped           | Ethiopia          | 1                 | [13]               |
| Arabo            | 10       | rumped           | Ethiopia          | 1                 | [13]               |
| Adane            | 12       | rumped           | Ethiopia          | 1                 | [13]               |
| Molale (Menz)    | 15       | short fat-tail   | Ethiopia          | 1                 | [13]               |
| Gafera (Washera) | 15       | short fat-tail   | Ethiopia          | 1                 | [13]               |
| Huri             | 7        | fat-tail         | Arabian peninsula | 3                 | [13]               |
| Naimi            | 7        | fat-tail         | Arabian peninsula | 3                 | [13]               |
| Najdi            | 6        | fat-tail         | Arabian peninsula | 3                 | [13]               |
| Omani            | 10       | fat-tail         | Arabian peninsula | 3                 | [13]               |
| Barbaresca       | 30       | fat-tail         | Italy             | 4                 | [9]                |
| Laticauda        | 24       | fat-tail         | Italy             | 5                 | [12]               |
| Libyan Barbary   | 23       | fat-tail         | Algeria           | 6                 | [9]                |
| Hammari          | 7        | thin-tail        | Sudan             | 1,2,3             | [13]               |
| Kabashi          | 8        | thin-tail        | Sudan             | 1,2,3             | [13]               |
| Sardinian        | 24       | thin-tail        | Italy             | 4,5               | [12]               |
| Comisana         | 24       | thin-tail        | Italy             | 4,5               | [12]               |
| Sidaoun          | 39       | thin-tail        | Algeria           | 6                 | This study         |

489

490

492 **Table 2. Number of significant single nucleotide polymorphisms (SNPs) obtained with the two**  
493 **selection signature approaches in the six pair-wise comparisons.**

| Pair-wise comparison       |                        | No. significant SNPs   |                                                       |
|----------------------------|------------------------|------------------------|-------------------------------------------------------|
| Fat-tail group             | Thin-tail group        | <i>Rsb</i><br>P<0.0005 | Bonferroni corrected $\chi^2$ P-<br>value $\leq 0.05$ |
| Ethiopian fat-tail         | Hammary and Kabashi    | 99                     | 754                                                   |
| Ethiopian long fat-tail    | Hammary and Kabashi    | 106                    | 1,114                                                 |
| Arabian peninsula fat-tail | Hammary and Kabashi    | 64                     | 108                                                   |
| Barbaresca                 | Sardinian and Comisana | 638                    | 2,402                                                 |
| Laticauda                  | Sardinian and Comisana | 158                    | 328                                                   |
| Libyan Barbary             | Sidaoun                | 185                    | 302                                                   |

494

496 **Table 3. Run of homozygosity (ROH) islands identified within each breed.** The chromosome  
 497 (OAR), the number of single nucleotide polymorphisms (SNPs) within each ROH island and the  
 498 positions of the genomic regions (in base pairs, bp) are reported.

| Breeds/groups                              | OAR | N of SNPs | Start (bp)  | End (bp)    |
|--------------------------------------------|-----|-----------|-------------|-------------|
| Ethiopian fat-tail (11 breeds)             | 5   | 17        | 48,278,057  | 49,199,542  |
|                                            | 10  | 34        | 36,757,445  | 39,446,610  |
| Ethiopian long fat-tail (6 breeds)         | 5   | 29        | 47,692,576  | 49,199,542  |
|                                            | 2   | 8         | 131,264,212 | 131,695,396 |
| Arabian peninsula fat-tail                 | 2   | 11        | 135,482,289 | 136,005,787 |
|                                            | 4   | 25        | 26,305,564  | 27,655,062  |
| Barbaresca                                 | 6   | 48        | 34,851,127  | 38,495,020  |
| Laticauda                                  | 3   | 7         | 13,571,685  | 13,899,340  |
| Libyan Barbary                             | 2   | 12        | 113,637,672 | 114,513,743 |
|                                            | 7   | 76        | 94,404,153  | 98,581,328  |
| Sudan (Hammary and Kabashi)                | 1   | 9         | 198,471,933 | 198,933,003 |
|                                            | 2   | 5         | 38,190,022  | 38,368,173  |
| Sidaoun                                    | 2   | 35        | 38,827,516  | 40,453,440  |
|                                            | 13  | 17        | 35,563,319  | 36,504,021  |
| Italian thin-tail (Comisana and Sardinian) | 2   | 64        | 71,595,057  | 75,092,467  |

500 **Table 4. Candidate regions and genes identified in two or more pair-wise comparisons (see material and methods). Start/end positions are**  
501 **based on the ovine genome sequence assembly Oar\_v4.0.**

| Pair-wise comparison group |                          |                          |                            |                          |                            |                            |                                                                                                                                                                                                                |
|----------------------------|--------------------------|--------------------------|----------------------------|--------------------------|----------------------------|----------------------------|----------------------------------------------------------------------------------------------------------------------------------------------------------------------------------------------------------------|
|                            | 1                        | 2                        | 3                          | 4                        | 5                          | 6                          | Genes                                                                                                                                                                                                          |
| OAR                        | start/end (bp)           | start/end (bp)           | start/end (bp)             | start/end (bp)           | start/end (bp)             | start/end (bp)             |                                                                                                                                                                                                                |
| 3                          |                          |                          | 104,333,496<br>105,210,346 |                          |                            | 104,291,439<br>105,909,563 | <i>ZNF2, ZNF514, MRPS5, MALL, NPHP1, ACOXL, BUB1, BCL2L11, ANAPC1, MERTK</i>                                                                                                                                   |
| 3                          |                          |                          |                            |                          | 154,458,718<br>156,011,304 | 155,014,204<br>155,055,875 | <i>MSRB3, WIF1, LEMD3, TBC1D30, GNS, RASSF3, TBK1, SRGAP1, TMEM5</i>                                                                                                                                           |
| 5                          | 482,26,104<br>48,526,532 | 46,925,830<br>49,273,852 |                            |                          |                            |                            | <i>EGR1, ETF1, HSPA9, CTNNA1, SIL1, MATR3, PAIP2, SPATA24, SLC23A1, PROB1, MZB1, DNAJC18, TMEM173, ECSCR, UBE2D2, CXXC5, PSD2, NRG2, PURA, IGIP, PFDN1, HBEGF, CYSTM1, SLC4A9, TMCO6, WDR55, HARS2, NDUFA2</i> |
| 6                          |                          |                          |                            | 38,104,576<br>39,576,650 | 38,179,178<br>39,639,829   |                            | <i>TRNASTOP-UCA, LOC106991224</i>                                                                                                                                                                              |
| 6                          | 55,697,868<br>55,794,685 | 55,697,868<br>55,811,685 |                            |                          |                            |                            | <i>DTHD1</i>                                                                                                                                                                                                   |
| 6                          | 75,842,854<br>76,599,033 |                          |                            |                          | 75,533,914<br>75,941,134   |                            | <i>ADGRL3</i>                                                                                                                                                                                                  |
| 6                          | 80,325,742<br>80,531,786 |                          |                            |                          |                            | 80,878,591<br>80,912,095   | <i>EPHA5</i>                                                                                                                                                                                                   |
| 10                         | 40,258,505<br>45,063,369 | 40,594,254<br>45,416,672 |                            |                          | 40,957,582<br>45,416,672   | 42,194,236<br>45,155,143   | <i>PCDH9, LOC101121526, KLHL1</i>                                                                                                                                                                              |
| 12                         |                          |                          |                            |                          | 43,000,381<br>43,168,807   | 43,168,807<br>43,297,179   | <i>RERE, SLC45A1</i>                                                                                                                                                                                           |
| 13                         |                          |                          |                            |                          | 46,565,715<br>49,137,513   | 47,583,113<br>49,208,171   | <i>CDS2, PROKR2, GPCPD1, CHGB, TRMT6, CRLS1, LRRN4, FERMT1, BMP2</i>                                                                                                                                           |
| 17                         | 61,094,671<br>61,631,272 |                          |                            |                          |                            | 61,496,170<br>61,658,381   | <i>OAS2, OAS1, RPH3, PTPN11, RPL6, HECTD4</i>                                                                                                                                                                  |
| 18                         | 1,895,285<br>2,129,462   | 1,980,832<br>2,243,903   |                            |                          |                            |                            | <i>ATP10A</i>                                                                                                                                                                                                  |
| 19                         | 51,617,073<br>51,789,681 | 51,649,648<br>51,819,178 |                            |                          |                            |                            | <i>MAP4, DHX30, SMARCC1</i>                                                                                                                                                                                    |

## 503 **Supporting information**

504 **S1 Table. Significant markers for *Rsb* in Ethiopian fat-tail breeds (eleven breeds) contrasted**  
505 **with two thin-tail breeds from Sudan (Hammari and Kabashi).**

506 **S2 Table. Significant markers for *Rsb* in Ethiopian long fat-tail breeds (six breeds) contrasted**  
507 **with two thin-tail breeds from Sudan (Hammari and Kabashi).**

508 **S3 Table. Significant markers for *Rsb* in Arabian Peninsula fat-tail breeds (Naimi, Najdi,**  
509 **Omani and Huri) contrasted with two thin-tail breeds from Sudan (Hammari and Kabashi).**

510 **S4 Table. Significant markers for *Rsb* in Barbaresca fat-tail breed contrasted with two Italian**  
511 **thin-tail breeds (Sardinian and Comisana).**

512 **S5 Table. Significant markers for *Rsb* in Laticauda fat-tail breed contrasted with two Italian**  
513 **thin-tail breeds (Sardinian and Comisana).**

514 **S6 Table. Significant markers for *Rsb* in Libyan Barbary fat-tail breed contrasted with**  
515 **Sidaoun thin-tail breed.**

516 **S7 Table. Significant markers for  $F_{ST} / \chi^2$  in Ethiopian fat-tail breeds (eleven breeds)**  
517 **contrasted with two thin-tail breeds from Sudan (Hammari and Kabashi).**

518 **S8 Table. Significant markers for  $F_{ST} / \chi^2$  in Ethiopian long fat-tail breeds (six breeds)**  
519 **contrasted with two thin-tail breeds from Sudan (Hammari and Kabashi).**

520 **S9 Table. Significant markers for  $F_{ST} / \chi^2$  in the Arabian Peninsula fat-tail breeds (Naimi,**  
521 **Najdi, Omani and Huri) contrasted with two thin-tail breeds from Sudan (Hammari and**  
522 **Kabashi).**

523 **S10 Table. Significant markers for  $F_{ST} / \chi^2$  in Barbaresca fat-tail breed contrasted with two**  
524 **Italian thin-tail breeds (Sardinian and Comisana).**

525 **S11 Table. Significant markers for  $F_{ST} / \chi^2$  in Laticauda fat-tail breed contrasted with two**  
526 **Italian thin-tail breeds (Sardinian and Comisana).**



- 527 **S12 Table. Significant markers for  $F_{ST} / \chi^2$  in Libyan Barbary fat-tail breed contrasted with**  
528 **Sidaoun thin-tail breed.**
- 529 **S1 Fig. Manhattan plot of OAR 3 depicting signals of fat-tail shared between Arabian**  
530 **Peninsula breeds (Naimi, Najdi, Omani and Huri) and Libyan Barbary.**
- 531 **S2 Fig. Manhattan plot of OAR 3 depicting signals of fat-tail shared between Laticauda and**  
532 **Libyan Barbary.**
- 533 **S3 Fig. Manhattan plot of OAR 5 depicting signals of fat-tail shared between the two groups**  
534 **of Ethiopian breeds.**
- 535 **S4 Fig. Manhattan plot of OAR 6 depicting signals of fat-tail shared between Barbaresca and**  
536 **Laticauda.**
- 537 **S5 Fig. Manhattan plot of OAR 6 depicting signals of fat-tail shared between the two groups**  
538 **of Ethiopian breeds.**
- 539 **S6 Fig. Manhattan plot of OAR 6 depicting signals of fat-tail shared between Ethiopian fat-**  
540 **tail breeds and Laticauda.**
- 541 **S7 Fig. Manhattan plot of OAR 6 depicting signals of fat-tail shared between Ethiopian fat-**  
542 **tail breeds and Libyan Barbary.**
- 543 **S8 Fig. Manhattan plot of OAR 7 depicting signals of fat-tail shared between Barbaresca and**  
544 **Laticauda.**
- 545 **S9 Fig. Manhattan plot of OAR 10 depicting signals of fat-tail shared between the two groups**  
546 **of Ethiopian breeds, Laticauda and Libyan Barbary.**
- 547 **S10 Fig. Manhattan plot of OAR 12 depicting signals of fat-tail shared between Laticauda and**  
548 **Libyan Barbary.**
- 549 **S11 Fig. Manhattan plot of OAR 13 depicting signals of fat-tail shared between Laticauda and**  
550 **Libyan Barbary.**
- 551 **S12 Fig. Manhattan plot of OAR 17 depicting signals of fat-tail shared between Ethiopian fat-**  
552 **tail breeds and Libyan barbary**

553 **S13 Fig. Manhattan plot of OAR 18 depicting signals of fat-tail shared between the two**  
554 **groups of Ethiopian breeds.**

555 **S14 Fig. Manhattan plot of OAR 19 depicting signals of fat-tail shared between the two**  
556 **groups of Ethiopian breeds.**

557 **S15 Fig. Regions of homozygosity in the fat-tail group/breeds. The threshold used to detect**  
558 **high-homozygosity regions is indicated with a black line.**

559 **S16 Fig. Regions of homozygosity in the thin-tail group/breeds. The threshold used to detect**  
560 **high-homozygosity regions is indicated with a black line.**

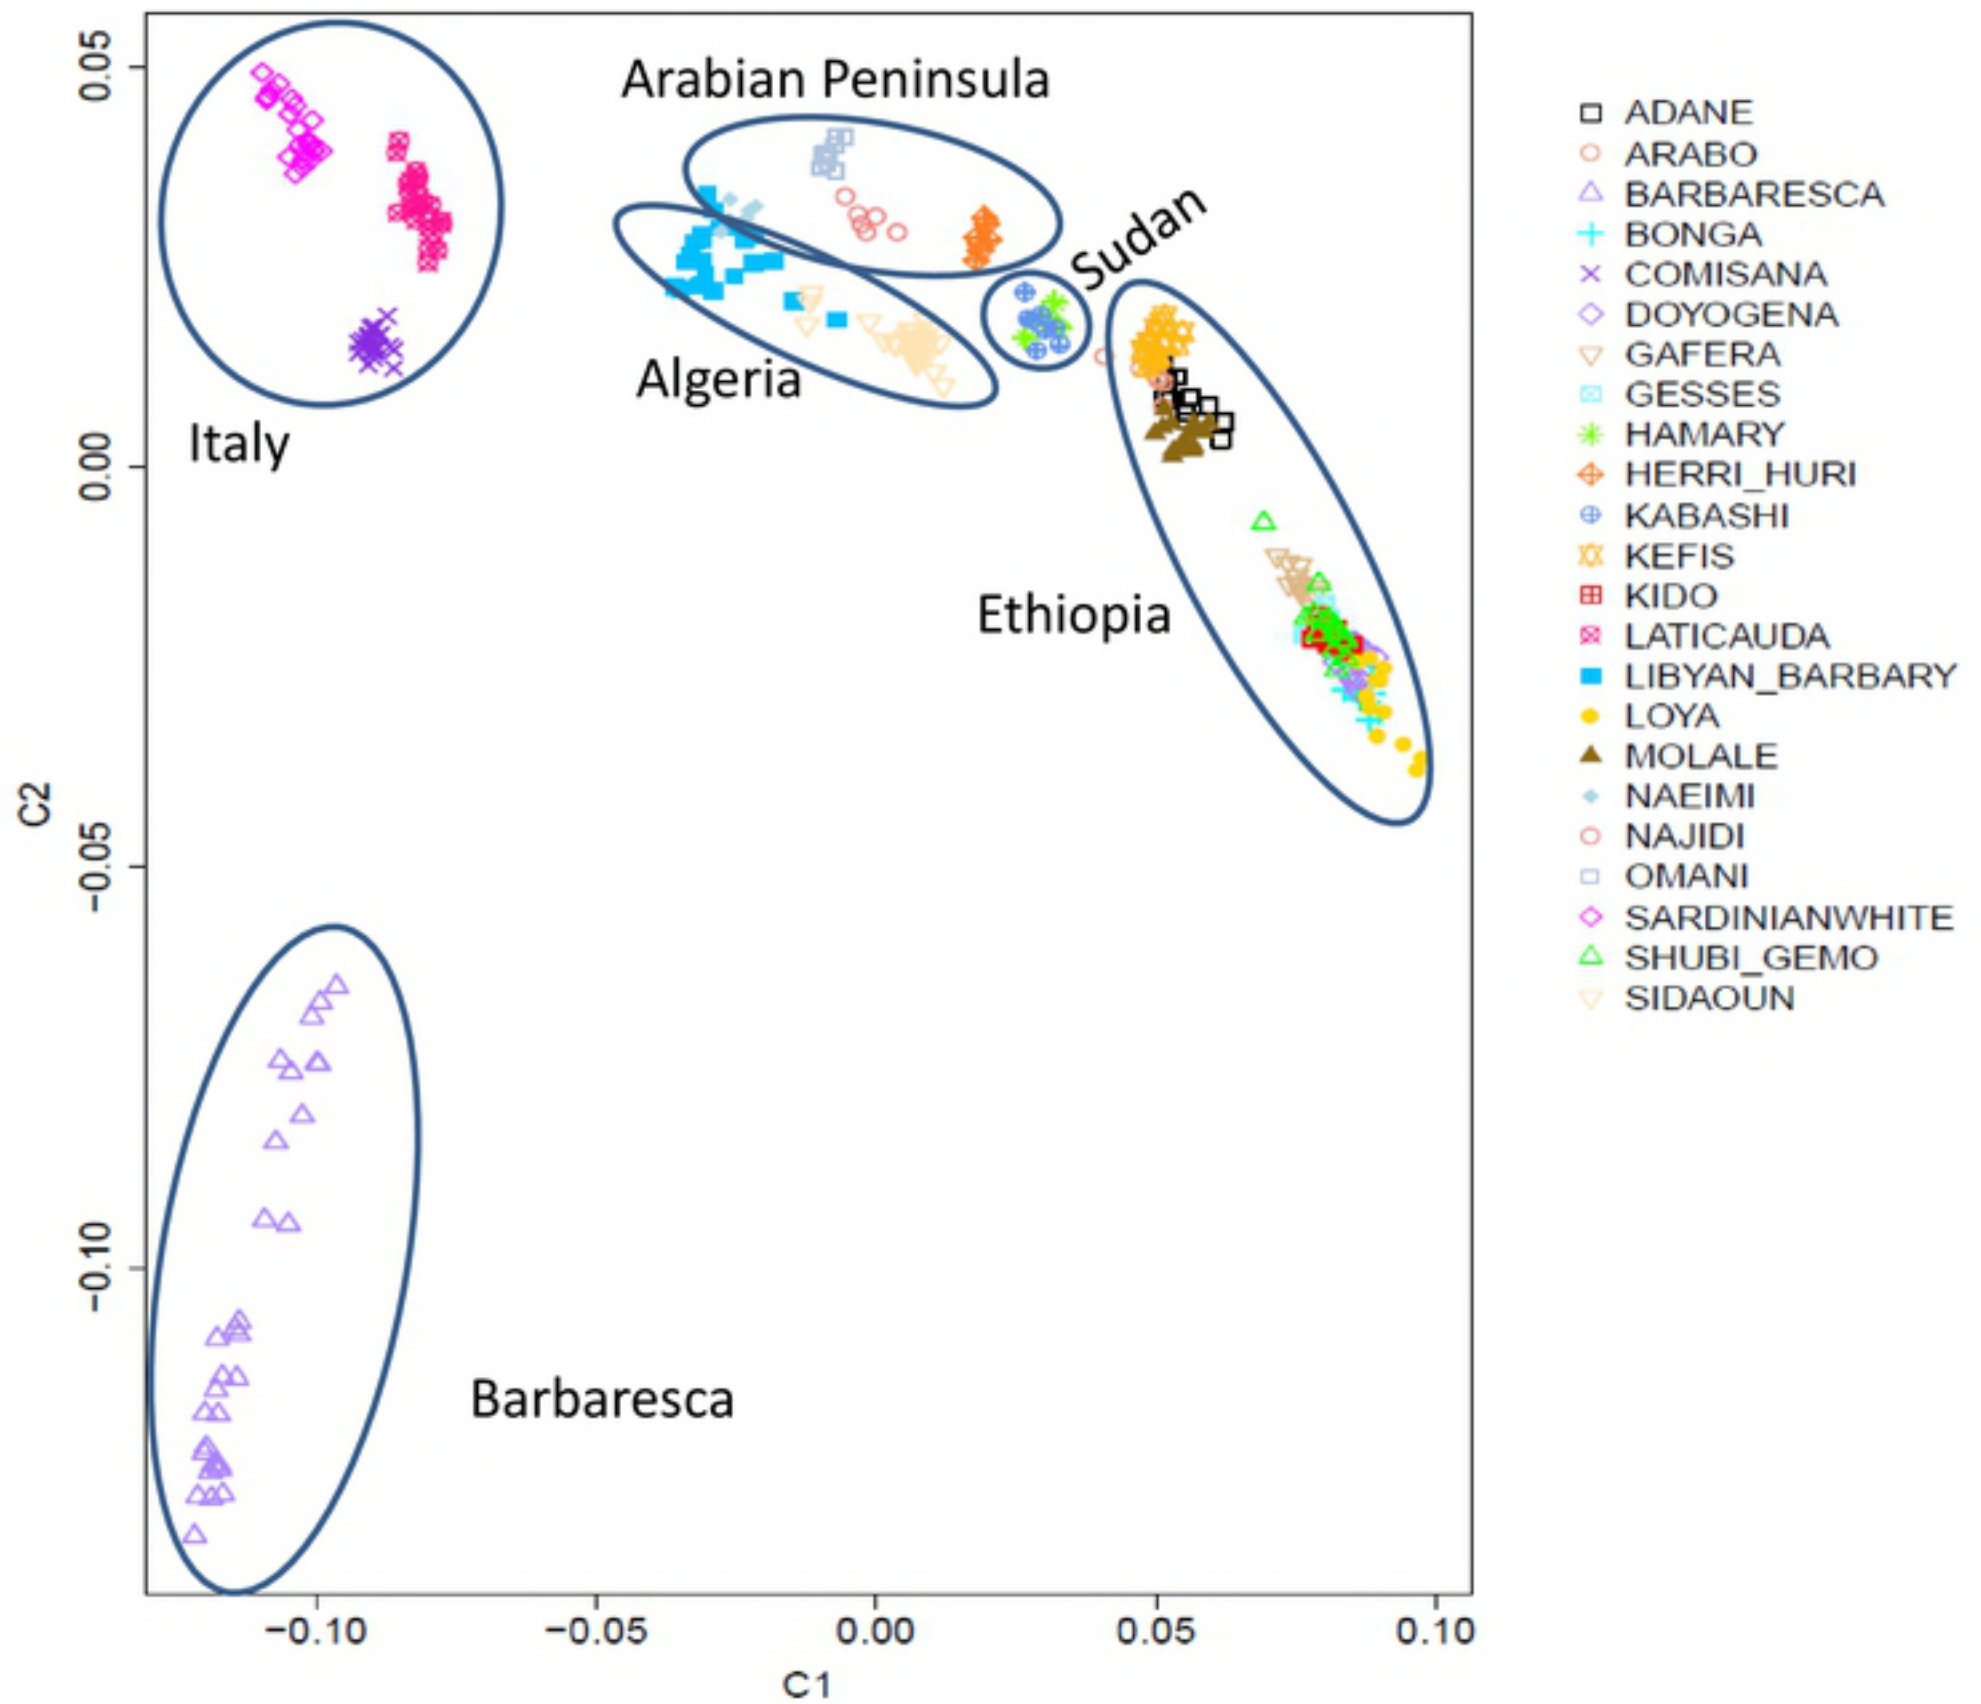

Figure 1
